# Supplementary material for: HLA Ligand Atlas: a benign reference of HLA-presented peptides to improve T-cell-based cancer immunotherapy
Source: J Immunother Cancer. 2021 Apr 15;9(4):e002071. doi: 10.1136/jitc-2020-002071 (PMC8054196; doi:10.1136/jitc-2020-002071)
Supplement: Supplementary data [file jitc-2020-002071supp004.xlsx]

## Sheet: HLA-I tissue-exclusive IDs
Table S5: Tissue-Specific Source Proteins
percentage	n_all	n	tissue_name	unique_gene_ids
0.00398406	1255	5	Mamma	GUC2F	GUC2D	TGM3L	GCYB2	TNMD
0.00323858	2779	9	Muscle	FSD1	RTL4	SPNXC	SPNXA	ADCYA	JSPR1	VGLL2	B3GT2	SPNXD
0.00276625	3615	10	Aorta	EFC4B	LIPK	EDIL3	FETA	VWA3B	SPOC1	RFX6	HTRA3	XKR5	K0232
0.00335973	4167	14	Bladder	HXA13	CA213	PI16	CNBP	TERB1	LORF2	DAAF1	ZN668	OSGP2	PAMR1	CTSR4	THA10	HXC13	APOM
0.0042349	3542	15	Uterus	CD320	LAP4B	UCP2	CLVS2	CC136	FRMD7	MSRB3	ARHGP	UCP3	HXD11	TESK1	C1QT4	ZGLP1	NCS1	EMX2
0.00481203	3325	16	Skin	SLUR1	ENDOU	CLD1	CA2D4	NUA4L	DSCL1	SCUB3	TFAP4	PTPRQ	SCUB1	TYRP1	DMKN	SCUB2	GXLT2	AP2C	RBFA
0.00540833	3698	20	Heart	STRCL	RBX2	STRC	SRCA	CLCN2	MAGA4	OR5DI	KI26A	KAZD1	XIRP1	HV741	LRP8	HV102	CORIN	LRCL1	MOS	NEBL	MAGA8	MAGC1	ANF
0.00389177	5396	21	Esophagus	KLK8	SUV91	NKG2A	CAVN4	AKND1	PHLA3	XAGE3	RPC7	LIPJ	NMDE4	NK1R	PITX1	GREM2	XAGE5	AGRB2	PHYIP	DPOD2	XAGE2	FMOD	PTHY	TM11D
0.00541814	4245	23	Testis	GAGE6	K1210	OOSP2	GAG2A	SPAG1	VCX2	OR4CG	O52B2	GGE2D	CT47B	GAGE5	NAL10	CST9L	GAG10	TOM34	COX8C	HMGN5	GAG2B	SRY	PLPP	SC6A2	TSN11	GAG13
0.00866496	3116	27	Pancreas	SPY2	INS	R10B2	P5CR3	DRD3	LIPR1	WNT8B	CC14C	SPI2	C56D2	ISK1	MAGAA	PA21B	RHBG	MBOA4	R10B1	CC14B	PDK3	DRD2	KCIP4	N62CL	CD045	CTRB1	VGF	ZNT3	INSR2	CTRB2
0.00490712	5706	28	Thyroid	TRPC4	DRC1	DGKB	CP071	CHST6	CC191	FZD4	S26A4	CALCA	AGRG3	TMED1	CTCFL	CO6A6	SOAT	NTCP4	CALC	SIA7F	CALCB	EPHA4	R4RL2	KLH33	I23O2	TM115	MOGT3	MYCT1	SMIM5	ENVT1	ISLR
0.00895695	3461	31	Brain	MEG10	CSKI1	BRNP2	CCD61	LRFN3	FAT3	CNBD1	CNTP5	S14L3	ZIC2	VATG2	F174A	PDE1A	MAGC3	KCNB1	SNR27	VIAAT	MA6D1	NR2E1	ADA11	CAMKV	WIF1	LYRM9	SLIK1	CRF	TKNK	DBND1	NDP	NPY	COKA1	GRID1
0.00640184	6092	39	Adrenal gland	3BHS1	KCNK2	PNMT	CXCL2	RUN3B	TSH2	IFM10	TFB1M	GROA	INCA1	S29A4	ING2	CAC1B	DNER	KCD14	RFNG	COA5	AMERL	THTPA	KCNG4	CJ126	LDLR	BATF2	KCNK3	HDHD5	BCDO2	KV224	FABD	ACYP1	CCN3	CXCL3	SHH	DPOLL	KVD24	COSA1	NDUF5	UBX2B	SLIT1	P2RY1
0.00734372	5583	41	Tongue	ROMO1	SOX2	MXRA5	OR6M1	CNTF	NPHN	TGM5	NUDT8	RP1L1	TRDN	KCD11	TIM8A	FBX8	CO7A1	CH076	TENN	ANR65	MRP7	TGM1	MLN	EGR2	CAR14	LMOD3	CE128	FA83H	SDC2	SMR3A	TNNI2	O52A5	LYPD3	PROM2	PAX3	KLK10	LEGL	GP15L	SPEG	ARHL1	PERM1	ZHX1R	PA2GD	EGR3
0.009684	5886	57	Colon	AG1L2	TRI36	FAM3D	LITD1	CD33	S45A3	DYH3	OR4Q3	FANCJ	MRP9	RETNB	TRPM6	GPR35	ODBB	LRC31	HIG1C	ABCCB	NECT4	BACH2	RET	GCNT3	G3ST2	S38A4	PPM1E	AGRG6	CHST9	EFNB1	KLK1	CF141	C5AR2	BEST2	PCSK9	KCJ13	TF	BMP8A	TBC16	CNGA3	AKCL1	ETHE1	COPZ2	NPSR1	MUC13	RIPK2	SHSA9	FMN1	ZG16
0.0135496	4871	66	Cerebellum	RIT2	NRG2	CD046	P2Y12	ANGP1	TRPM3	NRX3B	F135B	G3ST3	F155A	O11H2	PP6R2	DNJ5B	VEGFA	GPR37	MAST1	PROB1	S39AC	ELOV2	CBLN3	ST32A	CI040	ZIC5	NDKM	NAL11	YAE1	GBRA4	S2552	RGS16	RT02	TRIL	WSCD2	ARG33	ARI5A	ENKUR	VGLU3	CRUM1	LGI3	DPOLM	HINT3	CAD22	SV2B	FMN2	TMM31	CAH10	ACHA4
0.0124251	6841	85	Small intestine	RM45	LHX6	MGAT3	PKHG6	JPH3	GIP	MMP27	SPAG4	VWDE	F71F1	CRTC1	RTL1	RN220	NOX3	S35G1	UNC5D	GBRE	JPH1	ASA2B	TREA	DHB8	PIGA	NALP4	NR0B2	S13A2	GUC2A	BCDO1	M4A10	PDX1	PKH4B	DHR11	GIMD1	TKN1	TM6S2	RM04	RGMA	SFXN2	ITLN2	DDIAS	S22AH	GLP2R	RT10	SYBU	RT34	HPSE2	C102A
0.0153911	7082	109	Kidney	PDE8A	STEA2	SC5AC	RASL1	S19A1	CAYP1	S22A6	CF206	S23A3	SIML1	STR3N	S13A3	LLPH	HEPS	DYH6	S6A18	IBP5	SIM24	DCDC2	PRS48	PDZ1P	GGT6	CAD16	PSD10	ZNT2	NHRF3	AQP6	NAT14	NHRF4	SELO	MEI4	FCAMR	GTPB3	CLBA1	VWA7	RGL3	MIOX	HOGA1	AP2D	TIKI2	KLD7A	CLCKB	S26A1	CLCKA	NAT8B	B3A4
0.0190229	6939	132	Liver	HARB1	COXM1	KCNJ4	HDHD1	HIPK4	STX7	KHK	ORNT1	CBSL	GCKR	ABCBB	SH23A	PLDX1	PRG4	SIAT1	BCKD	CP1A2	MASP2	VASH1	CHST4	F13B	FCN2	ARG35	PP14B	ECHD3	FHR5	HUTU	SPA11	ITGBL	MPC1L	ASPD	CDO1	DHB13	MLIP	AGRA3	MRM3	MOT11	DIC	NCBP2	GLP1R	RL37L	SCMH1	LY6L	ANGL8	SO1B1	F184B
0.0165328	8468	140	Lung	SC6A4	WDR93	FREM3	RAGE	LSM2	NFASC	MDGA1	GLPC	FCRL6	R113A	TAU	HPLN1	RAD54	TBC29	GTR14	C1QR1	CLTR2	UTER	SIRPG	EMP1	DUS8	BFSP1	PTTG	HBAT	DOXA1	VA0E2	PSPC	SCEL	ICAM5	OLFL3	HEAT4	AMPH	TRYD	R113B	PORIM	IDLC	MAON	NCAM2	TM50B	CUED1	SCOT2	CBPC3	RAB15	MIDUO	RXFP2	ROS1
0.0266931	6556	175	Ovary	CU062	CP19A	NHLC3	MGT4B	TV23C	FBLN4	PTN20	RGS22	FLRT2	HXC6	CT096	SFXN4	PKHA8	T4S19	RERGL	ANR16	AGAP9	HSF4	OR1J4	MB214	ARL15	ARVC	CCDC8	MLF1	F151B	SPICE	ABRX1	NECT2	AMER1	MTEF4	PAI1	CYAC3	LSHR	RADX	K154L	MRM2	PHAR3	TMM17	DYH5	IHO1	B4GN4	HS3S2	PEX7	FAKD3	NAC2	WDR92
0.0332147	9273	308	Spleen	PCDH7	ZN438	NEUS	ZN559	CDKL4	ZN343	TM129	FCG2A	ACKR3	TREX1	ZN696	CCYL2	RB27B	NTF3	C1QT1	NFXL1	LRRC9	NOL4	ZN514	CLC7A	1A1L2	MFRN2	RHD	RPH3L	KCA10	GOG6B	SCN2A	MAGI1	PRIC3	GBG4	TYW3	PLCX1	ZN806	RPEL1	MTG8	ZNF77	ZN648	EFC4A	GRM6	ADA2B	SIA7A	ROM1	MZF1	BMP2	NKX26	STK16
0.0726841	9273	674	Thymus	S2544	MSX2	HESX1	SFT2C	TRA2A	PARI	HV226	CRTAM	PCSK4	CDKA2	K1958	MS18B	BCL7C	CCR8	CASB	G137B	CE034	CAMP3	FX4L6	KRT37	RABEK	ENTD1	S2A4R	TRIM9	DYH17	TICN2	RWD2B	HMX1	MYO3B	WDR73	ICMT	EPHB6	ENDOV	TVA83	TR43B	ZRAB3	RN125	BIK	CC103	CLC1A	CDN1A	TVAL3	TVB64	RFC3	CTR3	O13J1
0.0127211
[truncated: 635 more columns]

## Sheet: HLA-II tissue-exclusive IDs
percentage	n_all	n	tissue_name	unique_gene_ids
0.00122026	6556	8	Ovary	CC116	AGAP3	MTMR9	KCNJ1	COMD4	TUT4	ANGE1	KDM5C
0.0063745	1255	8	Mamma	TEX30	F166B	ABI2	TRAK2	RRN3	CRNL1	DDB2	RN3P2
0.0086362	2779	24	Muscle	ANKR2	SARCO	S31D1	SMPX	MYO3A	MLIP	MASTR	AP4S1	DOK3	HBEGF	WIPI2	TM239	B2L15	SH3BG	S22AV	LMOD2	KRT38	MYOTI	JSPR1	NDST4	GIMA4	FACOS	TEX10	CI114
0.0116183	3615	42	Aorta	CND1	SPA9	COBA2	PNKP	RGPA2	CS2IP	THAP4	ATL1	GNB5	MFSD3	FZD4	TEX52	SCUB3	TYDP1	PREX1	KR212	WDR62	SRRM3	DIAP3	LMCD1	HV741	ZN644	STPG2	FOXP3	NET1	AGRG5	NUP88	LZTS2	LYPD3	ZN154	FCRL2	FADS1	SIR1	VP13A	PTTG1	IRX6	ATOH1	CP24A	CFA57	HJ01	2021-09-14	WFDC1
0.0138346	3325	46	Skin	CEAM4	CAF17	UNC79	DCAM	SUFU	FACR1	SCAR3	AGGF1	STS	ARSF	PRDM5	KCNA7	DCAF6	SPB7	GP162	CE046	CFA77	RF1M	ZIC2	IMUP	MGAP	VACHT	PPM1H	DPTOR	NR1I2	ZBT47	CJ120	TOX	ANKUB	LIN41	RESF1	RUSC2	IL5RA	IQCAL	CDX4	MTM1	DNM3B	PEMT	INF2	RAB23	ACV1B	SPHK1	ASPM	GG6L6	NOE2	DCR1B
0.0117591	4167	49	Bladder	TBX20	MYZAP	SUSD1	CCD70	GRB1L	CFA44	CF157	NPY1R	FERM1	PLCX3	ZN678	ANR12	KCNN1	RIC3	EIF3E	MYPT1	T2FA	ARHGH	RHBL2	CHD9	PGH1	NOP10	RN180	IRAK2	ETV3	DMRTC	KALRN	VITRN	STF1	ZSC22	AQP7	TSAP1	GREB1	CG025	TPOR	WAC	SCNBA	PLCB4	BMP7	WIPF1	ASA2B	TRI23	IL34	DAPK3	EDA	TAL1
0.00883452	5886	52	Colon	CF163	TAOK2	YK032	LMTK1	ZWINT	F111A	EFMT4	TM144	TRAF5	AB17C	NLRP9	CENPE	CEAM7	CD70	MSX1	ZN541	CLGN	MILK2	OR1N2	COR2A	FA47B	MEF2A	CA094	DHRS9	P4HA3	SAMD8	L2GL2	TO6BL	ZBT10	SOCS3	A2012	MUC13	AT8B1	SMYD1	TNR27	NDF6	IN80D	LOXL2	FA83B	O2AG2	FMO5	K1755	ADCL4	ADIP	FHL17	TRPC7
0.00931399	5583	52	Tongue	HXA13	NUTM1	BBS1	VS10L	NTPCR	KLF5	EPYC	PIWL4	NXPE1	S22AF	PGBD1	SMTL1	MYO5B	S35D2	MUC19	ANO7	TGM3L	BPIA2	KAL1L	MOC2B	DOCK3	ENO4	TRPM8	SOCS4	TADA3	ZNF70	DLL1	R10B1	MYOC	ZN114	OGFD1	MTA1	DNHD1	FGFP1	T229A	ZN786	CGAS	A4GAT	MPP5	LHX1	BPIB2	KLK14	KLK10	E2AK1	GGYF1	IL8
0.0146054	4245	62	Testis	NPHP4	GAGE6	PAX2	RHG28	GAG2A	GG12H	VCX2	BMS1	GG12G	UBTD1	VWCE	INHBB	OBP2B	GG12I	NFS1	MYO15	ANR31	NOG1	GGE2D	FMR1N	PRAF2	GAGE7	ANR11	GAGE5	BNC2	PLCB1	DPOLA	C1D	PLCA	VCX1	KCNK3	OR4K5	AGO3	DKKL1	OBP2A	OCC1	CCD62	ADCYA	NRAP	DHH	GAG2B	KLDC1	ZN521	STP1	CKLF2	REEP1
0.0200108	3698	74	Heart	LN28A	PLK5	DCD2C	OAZ2	BNIP5	CA2D4	CK5P1	CRCM	TFPI1	TRPV5	ASTL	RTTN	ASB15	NDUB7	CLIP3	SEM6C	ARHG3	MET18	ING2	ZC12D	AGRF3	ISLR2	RM10	ARMD3	ACBD4	K1H2	SRCH	TNNI3	CO061	FITM1	ASB18	CP2J2	KI26A	CPNE4	VW5B1	TRPV6	NKTR	ASH1L	PALMD	MER34	LUZP4	CPNE9	ZN443	MYPC3	APLD1	TENS4
0.0131441	5706	75	Thyroid	TT21B	P3H2	F155A	TM145	ILRL2	ZN614	OR1P1	P3C2B	P2RY2	HXD1	CNNM2	CB016	BUB1B	PKHM2	COASY	SIM2	PNMA1	CO040	MAGF1	TR49D	RM54	SYVN1	CHAP1	S17A9	ZN706	HECW2	MEGF6	STAG2	FMO2	TR49B	OR4KH	PUM3	F184B	MELPH	KS6A5	FHDC1	TBCE	PGBD4	UBP32	CHADL	RM46	PERT	BUB1	ABCG8	CNOT8	TOB2
0.02167	3461	75	Brain	EIPR1	IGDC3	OSBL1	MYPR	CCKN	B3GA1	NPS3B	CNDP1	PITM1	MAGD1	ZN397	FA83D	Z780A	YPEL3	PTPRR	ACV1C	UPK3A	DC2L1	FAT3	LOXH1	SMG5	BMI1	NTNG1	PNOC	NEUG	DLG2	STK24	ZIC5	AT2L1	CNTP2	PCGF2	SORC3	GBRB3	ELAV2	CCNJL	DYR1A	SCOC	SELN	CC130	CCD24	PIN4	HDA11	ZN573	YPEL1	CPPED	KCNQ3
0.0161231	5396	87	Esophagus	CP4X1	SGCA	CP250	TM10A	KS6A4	PPE1	RBM6	SYTM	CP2U1	DDX20	DDX49	ZN485	APC7	UPP1	WDR55	CQ077	O11H7	RALYL	ABHDB	TM135	COQ3	TOP1M	RN126	CLOCK	PDK1	ARL6	RN114	DCA16	PPM1K	KBL	MYOM3	MAJIN	M4K4	SMAD3	GLCTK	GTPB3	LPAR4	A30BL	SYEM	ZFP1	YI036	MYBPP	TRI72	PGP	ARP5	TARA
0.0288832	3116	90	Pancreas	OMA1	P5CR3	CK5P3	D19L3	KLH31	PCDA8	YLPM1	FCRL4	KIF1B	HV404	TTL	TSLP	UBP33	LONF2	XPP3	MBD4	SL9C2	MRCKA	F90AA	AL1L2	B9D1	ZNT3	A3LT2	F261	MYEF2	O13C2	DPM3	CACB4	AP3S1	AF17	F90A7	CAN11	H4G	SHL2A	PCDA4	UBP38	HDGR3	AMZ2	COG2	TF3C1	C19L2	F90AP	FSIP1	GATC	PCDA2	DONS
0.016415	6092	100	Adrenal gland	CRLF2	BGP11	SIK1	DNER	AMOL1	AASD1	CWC22	SKIL	YBEY	SNX13	UBXN7	CHST4	IGS11	AATF	CEPT1	TASO2	DPEP2	SPAT1	ZN174	P210L	ZN649	EXOC6	CP11A	ERCC2	CART	INHA	MITF	SPA24	FGRL1	O52Z1	DJC17	KCA10	PEX1	ZN638	EVPL	WASH6	EMC8	OR7A2	PERP	SIK1B	3BHS2	C11B2	INAM1	OR5H6	SPDYA	KCNA1
0.0200317	6939	139	Liver	AAKG1	PRAF1	FKRP	ORNT1	ODBB	PPIP2	S13A5	ACOX2	EMC3	ABCBB	OTOP2	SMAD4	AP1S1	COA1	NCOA2	ZBED6	ZN622	CP4FC	CRFR2	NGAP	PCID2	ELP3	LLPH	MDM4	RPTOR	ETHE1	EST3	EI2BB	TULP4	TOPZ1	FHL3	PNPO	AA1R	PDE6B	PRR11	GSTA4	RM13	PPARA	IL31R	ANKH1	BPHL	TMIG2	DCAF1	GLYL1	RTN2	GOLP3
0.0210393	7082	149	Kidney	PCCB	GSH0	PLGB	KHK	GLPK2	O4A16	ACOT2	PRP6	GP107	NXPE4	CUL7	E400N	PCY2	UROM	FMO1	NBPF8	DHI2	METRL	SC5AC	NBPFJ	KDM4B	LCA5	NBPFF	TRIL	PBX1	EVA1C	S22A6	WIPI4	GTPBA	S13A3	ZSC31	TSN1	CAD10	NBPFB	ELP1	CLRN3	TKTL2	NPT2A	5NT3B	PBX2	SIM24	GAMT	KCNG1	SC5A2	ZN318	PPR36
0.0365428	4871	178	Cerebellum	MITD1	KCNC3	OR8U1	STEAL	CNEP1	MRP5	RM42	RSAD2	PCNP	LGI4	APBB1	RSPRY	TRAF4	S4A8	TTI1	DCE2	AJM1	S19A2	GLT17	RDH11	TMM62	KKCC2	KCMF1	FGD5	RNH2A	RNF31	NACA2	DBND1	DCE1	TSG13	MGMT	PLK1	PHAR3	BUD23	PPR18	CP096	ARG28	NAC2	CTR2	CRML	KBTBB	CE152	KCNC1	PARVB	CEP72	CBLN3
0.0212445	9273	197	Spleen	SH2B1	PDE8A	TFEB	GNL3L	CR1	SUMO3	KPTN	SNAPN	EXOC2	2A5E	KCNH8	RGS22	FCRLA	ZC12B	FL2D	CADH8	GPIX	PIGO	CETN2	UD3A2	CA127	TLRN1	UCHL5	FOXK1	AP3S2	MADCA	ZN341	WDR75	B2LA1	RXRB	KMT2A	MEGF9	F13B	VATG3	RAI1	ATM	LSM7	ZN200	SCN1A	AIF1L	RLF	EXPH5	SIM15	NLK	SUN1	HTF4
0.0350826	6841	240	Small intestine	MED28	TIM9	ACM3	TCTA	RIOX1	HIPK3	SMS1	ANO10	GEMI8	NOP2	KLF17	SHKB1	ZPR1	B3GN5	FLVC1	CDKA2	YIF1A	JPH3	SYJ2B	DBF4B	CAP2	COQ7	POP1	PHF5A	RT22	PNM8A	SNF8	FBX24	SFRP5	MIPEP	CSTF1	EXOC3	SMRC1	SYNM	SGE2P	S22AN	ABCAC	SNR27	UTP15	C1GLC	ENTP4	S23A3	ZN891	YIPF5	COQ9	OSBL3
0.0327114	8468	277	Lung	RAMP2	PDPN	ZN423	TTC37	CDR2	RAGE	NRAM1	CD20B	MCEM1	NTRI	ARSK	M3K11	SKAP	VEGFD	BDNF	MMP28	REEP3	PXDNL	DEND3	SMUF2	TRPS1	CASP6	YETS2	PEBP4	MRGRE	CPMD8	SO4C1	MSH3	GET4	SIGIR	KIBRA	5HT6R	DGLA	MATN3	SMAD6	SPNS2	PUS7L	CAYP1	MAL2	LMBRL	ACM1	CUX2	SC11A	HOP	CTC1	PEN2
0.0608217	9273	564	Thymus	TSN14	SFT2C	RAE1	AEBP2	PDZD2	IL10	S36A1	CRTAM	STK40	ESIP1	GORAB	DUS2L	PT117	AN18A	CP100	KC1G1	FA53A	CASB	ZDH12	KXDL1	U17LH	TAF1C	LV310	RFTN1	CASP8	UBE2H	TREX1	VPS16	PA24A	IQEC1	SIA8B	EMD	K1671	FBX6	ICMT	MORN1	GMEB2	CLC1A	TRAD1	WDTC1	DCR1A	STA5A	KAD9	LEF1	TM11A	KC1G3
0.0195417
[truncated: 521 more columns]
